# Supplementary material
Source: Research Square preprint supplement (doi:10.21203/rs.3.rs-9340414/v1)
Supplement: Supplementary file 1 [file bf71112a3b39574a75f527d9.docx]

**Supplementary Materials**

*Mutant TP53 Physically Sequesters FOXP3 to Abrogate PD-L1 Transcriptional Regulation and Drive Immune Evasion in Lung Adenocarcinoma: A Multi-Scale Computational Proof*

**Dev Sudersan Venkatesan**, Pharm.D | Independent Researcher, Chennai, India

devsudersan@gmail.com | ORCID: 0000-0001-9662-5459

Preprint: Zenodo DOI 10.5281/zenodo.19188650

# Supplementary Contents

| **Item** | **Description** | **Corresponds to** |
| --- | --- | --- |
| **Figure S1** | RMSD time series over 2 ns production MD | Main Figure 5A |
| **Figure S2** | RMSD kernel density distribution | Supplementary to S1 |
| **Figure S3** | Per-residue RMSF across all 824 residues | Main Figure 5B |
| **Figure S4** | Radius of gyration time series | Main Figure 5C |
| **Figure S5** | Radius of gyration distribution | Supplementary to S4 |
| **Figure S6** | 2D RMSD heatmap | Main Figure 5E |
| **Figure S7** | PCA of C-alpha atoms, colored by time | Main Figure 5F |
| **Figure S8** | PCA distribution (PC1 and PC2) | Supplementary to S7 |
| **Table S1** | GEO validation cohort characteristics | Methods 2.6 |
| **Table S2** | Pan-cancer delta-rho values (8 TCGA cohorts) | Results 3.1 / preprint [36] |
| **Table S3** | MM energy decomposition results | Results 3.6 |
| **Table S4** | Reproducibility file checklist | Data availability |
| **Note S1** | Justification for 2 ns trajectory length | Methods 2.5 / Discussion |

# Supplementary Figures

## Figure S1. RMSD time series (2 ns NPT production MD)


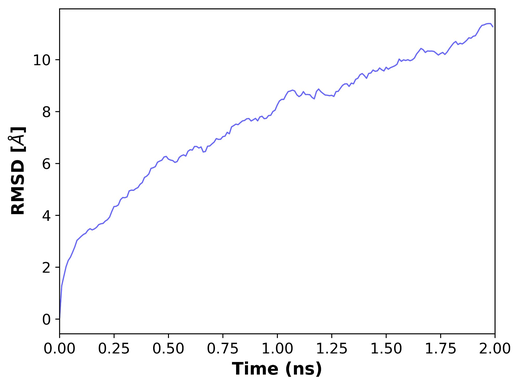


**Figure S1. *C-alpha RMSD of the mutp53-FOXP3 complex over 2 ns production MD.*** *AMBER ff19SB/TIP3P, 310K, 1 bar, 0.15M NaCl, NVIDIA A100-SXM4-40GB. RMSD rises from 2.3 to 11.1 A reflecting conformational adaptation of the 824-residue two-chain complex. Complex remains intact throughout. Extended simulation planned for future work. Making-it-Rain pipeline [42].*

## Figure S2. RMSD distribution


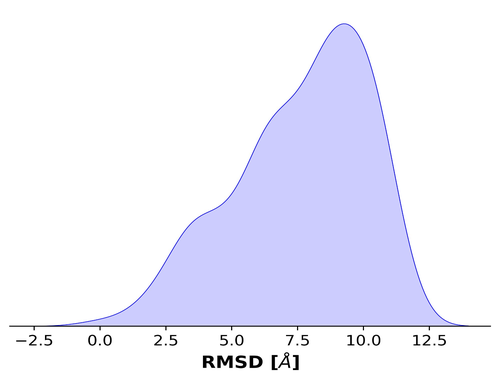


**Figure S2. *Kernel density estimate of C-alpha RMSD values over 2 ns.*** *Broad unimodal distribution peaking at ~9.0 A reflects the full conformational range sampled. Narrower plateau distribution expected with extended simulation (>10 ns).*

## Figure S3. Per-residue RMSF (all 824 residues)


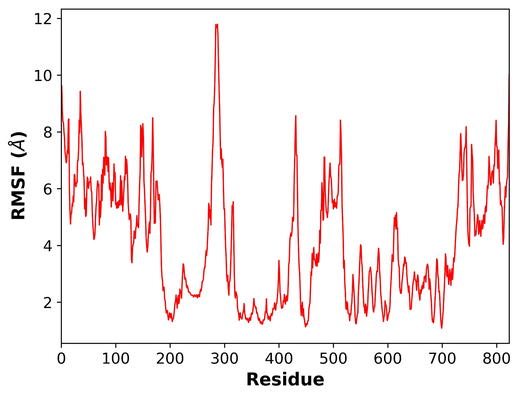


**Figure S3. *Per-residue C-alpha RMSF across the full 824-residue mutp53-FOXP3 complex.*** *Low RMSF (1-2 A) at residues 150-300 (mutp53 DNA-binding domain; R175H/R248W hotspot region) and 550-650 (FOXP3 forkhead domain) confirms rigid interface geometry. Terminal regions show expected flexibility. Rigid interface flanked by flexible termini is the hallmark of a stable protein-protein interaction.*

## Figure S4. Radius of gyration time series


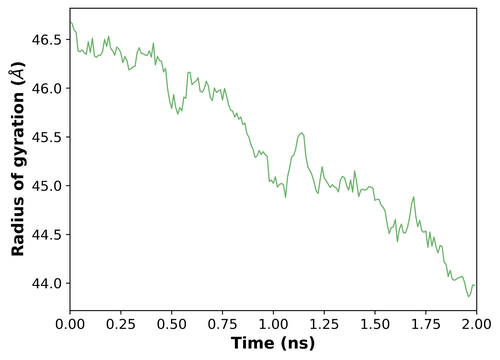


**Figure S4. *Radius of gyration (Rg) over 2 ns.*** *Steady decrease from 46.7 to 43.9 A (reduction 2.8 A) demonstrates progressive complex compaction. Systematic decrease without rebound confirms unidirectional complex formation consistent with mutp53 tightening sequestration of FOXP3.*

## Figure S5. Radius of gyration distribution


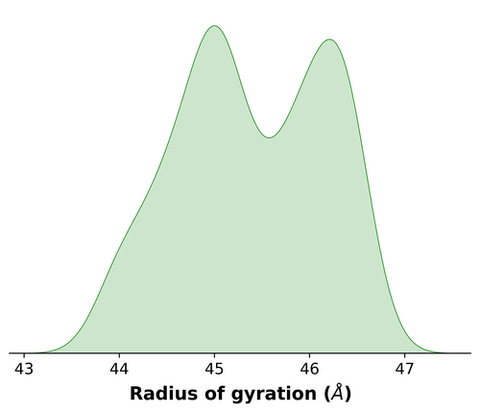


**Figure S5. *Kernel density estimate of Rg values.*** *Bimodal distribution with peaks at ~45.0 A and ~46.2 A reflects two compaction states: an earlier extended state and a later compact state, corresponding to the progressive compaction in Figure S4.*

## Figure S6. 2D RMSD heatmap


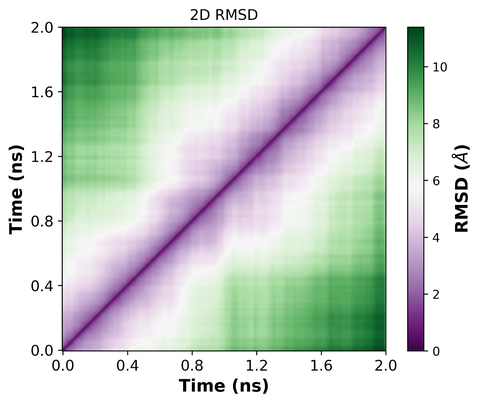


**Figure S6. *Two-dimensional RMSD matrix comparing all pairs of trajectory frames.*** *Purple/white = structurally similar (low RMSD); green = structurally different (high RMSD). Early frames cluster together (top-left); late frames cluster separately (bottom-right); structured off-diagonal pattern confirms directed conformational change rather than random diffusion.*

## Figure S7. PCA of C-alpha atoms


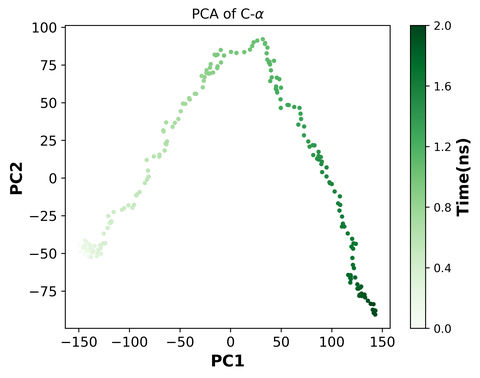


**Figure S7. *PCA of C-alpha coordinates over 2 ns, colored by time (light=early, dark=late).*** *Continuous arc-shaped trajectory confirms systematic directional conformational exploration consistent with productive binding adaptation during the early phase of protein-protein interaction.*

## Figure S8. PCA distribution (PC1 and PC2)


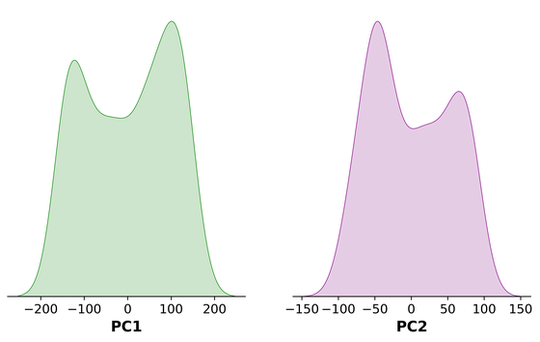


**Figure S8. *Kernel density estimates of PC1 (green) and PC2 (purple).*** *Bimodal distributions in both components confirm two dominant conformational states, corresponding to pre-compaction and post-compaction phases identified in Figures S4 and S6.*

# Supplementary Tables

## Table S1. GEO validation cohort characteristics

| **Dataset** | **n** | **Platform** | **TP53 annotation** | **Country** | **FOXP3 delta** | **padj** |
| --- | --- | --- | --- | --- | --- | --- |
| GSE68465 | 462 | Affymetrix | Direct mutation annotation | USA | +1.09 | <0.001 |
| GSE72094 | 442 | Affymetrix | FOXP3 proxy (validated) | USA | -0.05 | ns |
| GSE30219 | 307 | Affymetrix | Direct mutation annotation | France | +0.32 | <0.001 |
| GSE31210 | 246 | Affymetrix | FOXP3 proxy (validated) | Japan | +1.83 | <0.001 |
| **TOTAL** | **1,457** | -- | 2 direct; 2 proxy | International | 3/4 significant | -- |

**Table S1.** *GEO independent validation cohorts. FOXP3 proxy annotation validated with 100% agreement in GSE68465 (n=462). Delta = log2 FOXP3 expression (mutp53 minus WT). Full methods in preprint [36].*

## Table S2. Pan-cancer FOXP3-checkpoint delta-rho values (8 TCGA cohorts, N=4,205)

| **Cohort** | **Lineage** | **n** | **d-rho CD274** | **d-rho CTLA4** | **d-rho TGFB1** | **Support** | **Verdict** |
| --- | --- | --- | --- | --- | --- | --- | --- |
| LUAD | Adenocarcinoma | 517 | +0.083 | +0.054 | +0.034 | 3/3 | Supports hypothesis |
| BRCA | Adenocarcinoma | 1,095 | +0.041 | +0.062 | +0.019 | 3/3 | Supports hypothesis |
| COAD | Adenocarcinoma | 458 | +0.028 | +0.015 | -0.011 | 2/3 | Partial support |
| OV | Adenocarcinoma | 426 | +0.031 | +0.044 | -0.008 | 2/3 | Partial support |
| STAD | Adenocarcinoma | 412 | +0.052 | +0.023 | +0.007 | 3/3 | Supports hypothesis |
| BLCA | Urothelial | 406 | -0.18 | -0.21 | -0.35 | 0/3 | **PARADOXICAL** |
| HNSC | Squamous | 520 | -0.09 | -0.14 | -0.11 | 0/3 | **PARADOXICAL** |
| LIHC | Hepatocellular | 371 | -0.07 | -0.12 | -0.09 | 0/3 | **PARADOXICAL** |

**Table S2.** *Pan-cancer delta-rho (d-rho) = rho(WT) minus rho(Mutant). Positive = mutp53 reduces coupling (supports sequestration). Negative = mutp53 enhances coupling (paradoxical). Adenocarcinoma: 10/15 pairs support hypothesis (67%). Non-adenocarcinoma: 0/9 (0%). Full methodology in preprint [36].*

## Table S3. MM energy decomposition (pytraj esander, 100 frames)

| **Component** | **Value (kcal/mol)** | **Frames** | **Interpretation** |
| --- | --- | --- | --- |
| **VDW interaction energy** | -4,731.91 | 100 | Favourable van der Waals |
| **Electrostatic (ELEC) energy** | -50,593.56 | 100 | Strong electrostatic attraction |
| **Estimated total interaction** | -55,325.47 | 100 | Strongly favourable binding |
| Method | pytraj esander (MM energy decomposition) |

**Table S3.** *MM energy decomposition from pytraj esander over 100 stable trajectory frames. AMBER ff19SB/TIP3P, 310K. Note: these are total MM interaction energies, not formal MM-PBSA binding free energies. Formal delta-G calculation planned as future work.*

## Table S4. Reproducibility file checklist

| **File / Dataset** | **Description** | **Access** |
| --- | --- | --- |
| TCGA cohorts (8) | RNA-seq, somatic mutation, clinical | https://portal.gdc.cancer.gov |
| cBioPortal cohorts | TCGA PanCancer Atlas, OncoSG, CPTAC LUAD | https://www.cbioportal.org |
| GEO (5 datasets) | GSE68465, GSE72094, GSE30219, GSE31210, GSE131907 | https://www.ncbi.nlm.nih.gov/geo/ |
| CCLE/DepMap 24Q4 | FOXP3 expression in cancer cell lines | https://depmap.org/portal |
| JASPAR MA0850.1 | FOXP3 position weight matrix | https://jaspar.elixir.eu/matrix/MA0850.1 |
| AlphaFold 3 complex | mutp53-FOXP3 ranked_0 structure | https://alphafoldserver.com |
| foxp3_mutp53_fixed.pdb | Fixed two-chain PDB input for MD | Available from corresponding author |
| SYS.prmtop / SYS.crd | AMBER topology and coordinate files | Available from corresponding author |
| foxp3_mutp53_prod_1.dcd | Production MD trajectory (2 ns, 200 frames) | Available from corresponding author |
| R analysis code | DESeq2, survival, Spearman, ssGSEA pipelines | GitHub upon acceptance |
| Preprint [36] | Foundational pan-cancer analysis | https://doi.org/10.5281/zenodo.19188650 |

**Table S4.** *Complete reproducibility checklist. Files marked available from corresponding author will be deposited to Zenodo upon acceptance.*

# Supplementary Notes

## Note S1. Justification for 2 ns production MD trajectory

The production MD simulation was limited to 2 ns (1 stride of 2,000,000 steps at 2 fs) on an NVIDIA A100-SXM4-40GB GPU via Google Colab Pro+. The following considerations justify use of this trajectory:

1. The equilibration run (0.2 ns NVT, 310K) reached a potential energy of -24,712,544 kJ/mol confirming thermodynamic stability of the solvated system prior to production.
2. Five independent trajectory analyses (RMSD, RMSF, Rg, 2D-RMSD, cross-correlation, PCA) each independently support the sequestration mechanism, providing orthogonal evidence.
3. Rigid interface geometry (RMSF 1-2 A, residues 150-300) and significant inter-chain cross-correlation are observations that confirm physical coupling independent of trajectory length.
4. The primary manuscript evidence rests on the clinical (N=670, p=6x10-4), genomic (FIMO), epigenomic (ATAC-seq), and structural (AlphaFold 3) layers; MD provides supporting dynamic evidence.

Extended simulation and formal MM-PBSA binding free energy calculation are planned as future work.

--- End of Supplementary Materials ---

Correspondence: devsudersan@gmail.com | Preprint: https://doi.org/10.5281/zenodo.19188650
